# Supplementary material
Source: HighWire-hosted journal article supplement (https://sti.bmj.com/content/sextrans-2016-053081)
Supplement: inline-supplementary-material-1 [file inline-supplementary-material-1.pdf]

Strain 1- E\_Aus56

Strain 2- F\_Aus51

Strain 3- B\_Aus45

|                        | Method A- dipping   |                 |             | Method B- pouring   |                 |             | Method A- dipping   |                 |             | Method B- pouring   |                 |             | Method A- dipping |       |          | Method B- pouring |       |       |
|------------------------|---------------------|-----------------|-------------|---------------------|-----------------|-------------|---------------------|-----------------|-------------|---------------------|-----------------|-------------|-------------------|-------|----------|-------------------|-------|-------|
|                        | Sample              | Cq              | ΔCq         | Sample            | Cq    | ΔCq      | Sample            | Cq    | ΔCq   |
| Experimenter 1         | S1-1A-N1            | 0.00            | NA          | S1-1B-N1            | 0.00            | NA          | S2-1A-N1            | 0.00            | NA          | S2-1B-N1            | 40.80           | NA          | S3-1A-N1          | 0.00  | NA       | S3-1B-N1          | 0.00  | NA    |
|                        | <del>S1-1A-12</del> | <del>0.00</del> | <del></del> | <del>S1-1B-12</del> | <del>0.00</del> | <del></del> | <del>S2-1A-12</del> | <del>0.00</del> | <del></del> | <del>S2-1B-12</del> | <del>0.00</del> | <del></del> | S3-1A-14          | 0.00  |          | S3-1B-14          | 0.00  |       |
|                        | S1-1A-12            | 0.00            |             | S1-1B-12            | 0.00            |             | S2-1A-12            | 0.00            |             | S2-1B-12            | 0.00            |             | S3-1A-12          | 0.00  |          | S3-1B-12          | 0.00  |       |
|                        | S1-1A-10            | 0.00            |             | S1-1B-10            | 0.00            |             | S2-1A-10            | 0.00            |             | S2-1B-10            | 0.00            |             | S3-1A-10          | 0.00  |          | S3-1B-10          | 0.00  |       |
|                        | S1-1A-08            | 0.00            |             | S1-1B-08            | 0.00            |             | S2-1A-08            | 0.00            |             | S2-1B-08            | 0.00            |             | S3-1A-08          | 0.00  |          | S3-1B-08          | 0.00  |       |
|                        | S1-1A-06            | 0.00            |             | S1-1B-06            | 0.00            |             | S2-1A-06            | 0.00            |             | S2-1B-06            | 0.00            |             | S3-1A-06          | 0.00  |          | S3-1B-06          | 40.00 |       |
|                        | S1-1A-04            | 40.40           |             | S1-1B-04            | 38.10           | 8.40        | S2-1A-04            | 38.30           | 9.10        | S2-1B-04            | 38.80           | 9.60        | S3-1A-04          | 36.00 | 8.60     | S3-1B-04          | 36.70 | 9.30  |
|                        | S1-1A-02            | 32.00           | 9.80        | S1-1B-02            | 31.80           | 9.60        | S2-1A-02            | 31.90           | 9.00        | S2-1B-02            | 32.20           | 9.30        | S3-1A-02          | 30.10 | 9.60     | S3-1B-02          | 30.30 | 9.80  |
|                        | S1-1A-00            | 25.10           | 8.20        | S1-1B-00            | 23.60           | 6.70        | S2-1A-00            | 25.00           | 7.40        | S2-1B-00            | 25.10           | 7.50        | S3-1A-00          | 23.30 | 8.40     | S3-1B-00          | 23.80 | 8.90  |
| S1-1A-N2               | 35.40               | 10.30           | S1-1B-N2    | 34.70               | 11.10           | S2-1A-N2    | 39.80               | 14.80           | S2-1B-N2    | 40.00               |                 | S3-1A-N2    | 32.50             | 9.20  | S3-1B-N2 | 32.00             | 8.20  |       |
| Experimenter 2         | S1-2A-N1            | 0.00            | NA          | S1-2B-N1            | 0.00            | NA          | S2-2A-N1            | 0.00            | NA          | S2-2B-N1            | 0.00            | NA          | S3-2A-N1          | 0.00  | NA       | S3-2B-N1          | 39.80 | NA    |
|                        | <del>S1-2A-12</del> | <del>0.00</del> | <del></del> | <del>S1-2B-12</del> | <del>0.00</del> | <del></del> | <del>S2-2A-12</del> | <del>0.00</del> | <del></del> | <del>S2-2B-12</del> | <del>0.00</del> | <del></del> | S3-2A-14          | 0.00  |          | S3-2B-14          | 40.20 |       |
|                        | S1-2A-12            | 0.00            |             | S1-2B-12            | 0.00            |             | S2-2A-12            | 0.00            |             | S2-2B-12            | 0.00            |             | S3-2A-12          | 0.00  |          | S3-2B-12          | 41.00 |       |
|                        | S1-2A-10            | 0.00            |             | S1-2B-10            | 0.00            |             | S2-2A-10            | 0.00            |             | S2-2B-10            | 0.00            |             | S3-2A-10          | 0.00  |          | S3-2B-10          | 0.00  |       |
|                        | S1-2A-08            | 0.00            |             | S1-2B-08            | 0.00            |             | S2-2A-08            | 0.00            |             | S2-2B-08            | 0.00            |             | S3-2A-08          | 0.00  |          | S3-2B-08          | 0.00  |       |
|                        | S1-2A-06            | 0.00            |             | S1-2B-06            | 0.00            |             | S2-2A-06            | 0.00            |             | S2-2B-06            | 0.00            |             | S3-2A-06          | 0.00  |          | S3-2B-06          | 45.50 |       |
|                        | S1-2A-04            | 39.70           | 10.00       | S1-2B-04            | 39.90           | 10.20       | S2-2A-04            | 0.00            |             | S2-2B-04            | 39.70           | 10.50       | S3-2A-04          | 0.00  |          | S3-2B-04          | 36.60 | 9.20  |
|                        | S1-2A-02            | 34.40           | 12.20       | S1-2B-02            | 33.00           | 10.80       | S2-2A-02            | 34.50           | 11.60       | S2-2B-02            | 33.60           | 10.70       | S3-2A-02          | 33.50 | 13.00    | S3-2B-02          | 30.20 | 9.70  |
|                        | S1-2A-00            | 27.80           | 10.90       | S1-2B-00            | 25.50           | 8.60        | S2-2A-00            | 28.20           | 10.60       | S2-2B-00            | 26.30           | 8.70        | S3-2A-00          | 26.30 | 11.40    | S3-2B-00          | 24.10 | 9.20  |
| S1-2A-N2               | 35.50               | 7.70            | S1-2B-N2    | 34.70               | 9.20            | S2-2A-N2    | 38.60               | 10.40           | S2-2B-N2    | 32.70               | 6.40            | S3-2A-N2    | 34.60             | 8.30  | S3-2B-N2 | 35.50             | 11.40 |       |
| Experimenter 3         | S1-3A-N1            | 0.00            | NA          | S1-3B-N1            | 40.10           | NA          | S2-3A-N1            | 0.00            | NA          | S2-3B-N1            | 40.60           | NA          | S3-3A-N1          | 0.00  | NA       | S2-3B-N1          | 39.60 | NA    |
|                        | <del>S1-3A-12</del> | <del>0.00</del> | <del></del> | <del>S1-3B-12</del> | <del>0.00</del> | <del></del> | <del>S2-3A-12</del> | <del>0.00</del> | <del></del> | <del>S2-3B-12</del> | <del>0.00</del> | <del></del> | S3-3A-14          | 0.00  |          | S2-3B-14          | 0.00  |       |
|                        | S1-3A-12            | 0.00            |             | S1-3B-12            | 0.00            |             | S2-3A-12            | 0.00            |             | S2-3B-12            | 0.00            |             | S3-3A-12          | 0.00  |          | S2-3B-12          | 39.40 |       |
|                        | S1-3A-10            | 0.00            |             | S1-3B-10            | 0.00            |             | S2-3A-10            | 0.00            |             | S2-3B-10            | 0.00            |             | S3-3A-10          | 0.00  |          | S2-3B-10          | 0.00  |       |
|                        | S1-3A-08            | 0.00            |             | S1-3B-08            | 0.00            |             | S2-3A-08            | 0.00            |             | S2-3B-08            | 0.00            |             | S3-3A-08          | 0.00  |          | S2-3B-08          | 0.00  |       |
|                        | S1-3A-06            | 0.00            |             | S1-3B-06            | 0.00            |             | S2-3A-06            | 0.00            |             | S2-3B-06            | 0.00            |             | S3-3A-06          | 0.00  |          | S2-3B-06          | 0.00  |       |
|                        | S1-3A-04            | 39.10           | 9.40        | S1-3B-04            | 37.40           | 7.70        | S2-3A-04            | 0.00            |             | S2-3B-04            | 0.00            |             | S3-3A-04          | 38.50 | 11.10    | S2-3B-04          | 38.00 | 10.60 |
|                        | S1-3A-02            | 34.30           | 12.10       | S1-3B-02            | 32.80           | 10.60       | S2-3A-02            | 36.20           | 13.30       | S2-3B-02            | 34.00           | 11.10       | S3-3A-02          | 33.10 | 12.60    | S2-3B-02          | 32.90 | 12.40 |
|                        | S1-3A-00            | 28.30           | 11.40       | S1-3B-00            | 24.90           | 8.00        | S2-3A-00            | 29.30           | 11.70       | S2-3B-00            | 26.90           | 9.30        | S3-3A-00          | 26.90 | 12.00    | S2-3B-00          | 25.90 | 11.00 |
| S1-3A-N2               | 39.00               | 10.70           | S1-3B-N2    | 38.20               | 13.30           | S2-3A-N2    | 38.80               | 9.50            | S2-3B-N2    | 39.50               | 12.60           | S3-3A-N2    | 37.70             | 10.80 | S3-3B-N2 | 37.30             | 11.40 |       |
| EB suspension dilution | <del>S1-12</del>    | <del>0.00</del> |             | <del>CS2-12</del>   | <del>0.00</del> |             | <del>S3-14</del>    | <del>0.00</del> |             | S3-14               | 0.00            |             |                   |       |          |                   |       |       |
|                        | S1-10               | 0.00            |             | CS2-10              | 0.00            |             | S3-12               | 37.20           |             | S3-12               | 37.20           |             |                   |       |          |                   |       |       |
|                        | S1-08               | 0.00            |             | CS2-08              | 37.90           |             | S3-10               | 0.00            |             | S3-10               | 0.00            |             |                   |       |          |                   |       |       |
|                        | S1-06               | 36.60           |             | CS2-06              | 36.10           |             | S3-08               | 39.10           |             | S3-08               | 39.10           |             |                   |       |          |                   |       |       |
|                        | S1-04               | 29.70           |             | CS2-04              | 29.20           |             | S3-06               | 34.90           |             | S3-06               | 34.90           |             |                   |       |          |                   |       |       |
|                        | S1-02               | 22.20           |             | CS2-02              | 22.90           |             | S3-04               | 27.40           |             | S3-04               | 27.40           |             |                   |       |          |                   |       |       |
|                        | S1-00               | 16.90           |             | CS2-00              | 17.60           |             | S3-02               | 20.50           |             | S3-02               | 20.50           |             |                   |       |          |                   |       |       |
|                        |                     |                 |             |                     |                 | S3-00       | 14.90               |                 | S3-00       | 14.90               |                 |             |                   |       |          |                   |       |       |

NA Not applicable

Not done

N1 Control 1- contact with synthetic urine prior to contact with the *C. trachomatis* dilutions

N2 Control 2- contact with synthetic urine after handwashing subsequent to contact with the *C. trachomatis* dilutions

00-14 Dilution factor of *C. trachomatis* culture
